# Supplementary material for: Nrf2‐Mediated Ferroptosis Inhibition Exerts a Protective Effect on Acute‐on‐Chronic Liver Failure
Source: Hindawi journal article supplement (doi:10.1155/2022/4505513), 2022-01-01

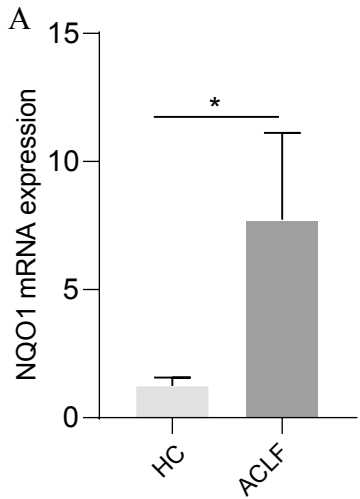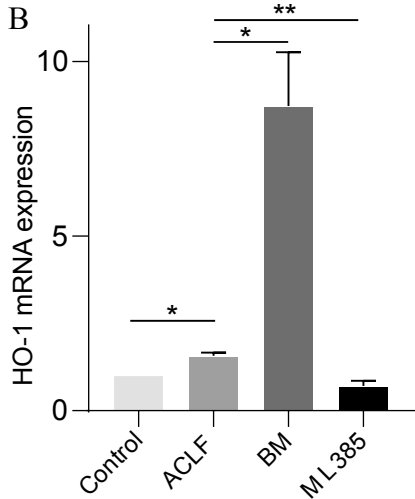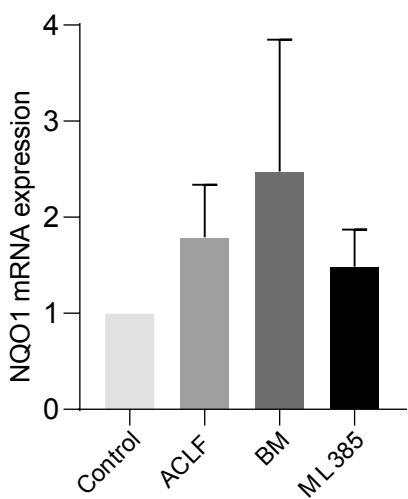

Supplement: f1 [file 4505513.f1.pdf]
