# Supplementary material for: Nrf2‐Mediated Ferroptosis Inhibition Exerts a Protective Effect on Acute‐on‐Chronic Liver Failure
Source: Hindawi journal article supplement (doi:10.1155/2022/4505513), 2022-01-01

A

NQO1

HO-1

GAPDH

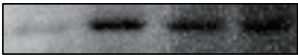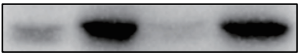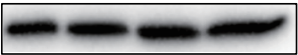

|                               |   |   |   |   |
|-------------------------------|---|---|---|---|
| H <sub>2</sub> O <sub>2</sub> | - | + | + | - |
| Fer-1                         | - | - | + | - |
| E                             | - | - | - | + |

B

|                               |   |   |   |   |
|-------------------------------|---|---|---|---|
| H <sub>2</sub> O <sub>2</sub> | - | + | + | + |
| BM                            | - | - | + | - |
| ML385                         | - | - | - | + |

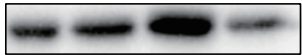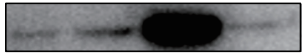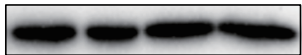

Supplement: f2 [file 4505513.f2.pdf]
